# Supplementary material
Source: Springer Nature journal article supplement (https://www.springermedizin.de/resource/supplementary/12992_2013_272_MOESM1_ESM.pdf/9616236)
Supplement: MOESM1 [file 9616236]

## Stage 1- Comparing Path Dependent Processes

|                                 | 1  | 2    | 3    |
|---------------------------------|----|------|------|
| <u>Path Dependent Concept:</u>  |    |      |      |
| <i>Legitimacy (L):</i>          | L  | L    | L    |
| <i>Increasing Returns (IR):</i> | IR | IR   | IR   |
| <u>Cause:</u>                   |    |      |      |
| <i>Reform (R)</i>               | R  | none | none |
| <u>Outcome:</u>                 | R  | No R | No R |

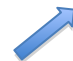

## Stage 2- Instances of Institutional Change

|                                      | 1              | 2    | 3    |
|--------------------------------------|----------------|------|------|
| <u>Theoretical Concept:</u>          |                |      |      |
| <i>Conversion (C):</i>               | C              | C    | C    |
| <i>Displacement (D):</i>             | D              | D    | D    |
| <u>Cause:</u>                        |                |      |      |
| <i>Sustainability Processes (SP)</i> |                |      |      |
|                                      | SP             | none | none |
| <u>Outcome:</u>                      | S <sup>1</sup> | none | none |

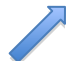

## Stage 3 – Learning from Sustainability

Learn from case of sustainability
